# Supplementary material for: Progressive influence of body mass index-associated genetic markers in rural Gambians
Source: HighWire-hosted journal article supplement (doi:10.1136/jmedgenet-2014-102784), 2015-04-28
Supplement: jmedgenet-2014-102784supp.pdf [file jmedgenet-2014-102784supp.pdf]

## **Supplementary File**

### **Progressive influence of BMI-associated genetic markers in rural Gambians**

Anthony J. Fulford<sup>1</sup>, Ken K. Ong<sup>2</sup>, Cathy E. Elks<sup>2</sup>, Andrew M. Prentice<sup>1</sup>, Branwen J. Hennig<sup>1</sup>

<sup>1</sup> MRC International Nutrition Group at LSHTM, UK & MRC Unit, The Gambia; Department of Epidemiology and Population Health, London School of Hygiene & Tropical Medicine, Keppel Street, London WC1E 7HT, UK.

<sup>2</sup> MRC Epidemiology Unit, University of Cambridge, School of Clinical Medicine, Box 285 Institute of Metabolic Science, Cambridge Biomedical Campus, Cambridge CB2 0QQ, UK.

**Supplementary Table 1.** Summary statistics of Gambian study population

| <b>A. Demographics</b>                   | <b>Females</b>   | <b>Males</b>     | <b>All</b> |
|------------------------------------------|------------------|------------------|------------|
| <b>Age<sup>1</sup>, adults</b>           |                  |                  |            |
| N                                        | 930              | 496              | 1426       |
| mean                                     | 26.3 y           | 28.9 y           |            |
| (range)                                  | (20.0, 82.8 y)   | (20.0, 82.6 y)   |            |
| <b>Village</b>                           |                  |                  |            |
| Keneba                                   | 844              | 625              | 1469       |
| Manduar                                  | 330              | 241              | 571        |
| Kanton Kunda                             | 294              | 201              | 495        |
| <b>Ethnicity, all (N, %)</b>             |                  |                  |            |
| Mandinka                                 | 1418             | 1003             | 2421       |
| Fula                                     | 36               | 44               | 80         |
| Other                                    | 13               | 21               | 34         |
| <b>B. Anthropometry at specific ages</b> | <b>Females</b>   | <b>Males</b>     | <b>All</b> |
| <b>Birth</b>                             |                  |                  |            |
| N                                        | 730              | 673              | 1403       |
| WT mean                                  | 2.87             | 3.03             |            |
| (range)                                  | (1.40, 4.02)     | (1.44, 4.41)     |            |
| zWT(UK)                                  | -1.22            | -1.12            |            |
| (range)                                  | (-4.98, 1.31)    | (-4.75, 1.71)    |            |
| <b>2 years<sup>2</sup></b>               |                  |                  |            |
| N                                        | 1044             | 776              | 1820       |
| WT mean                                  | 9.64             | 9.64             |            |
| (range)                                  | (5.17, 14.64)    | (5.71, 13.89)    |            |
| HT mean                                  | -2.14            | -2.55            |            |
| (range)                                  | (-8.33, 1.79)    | (-7.55, 0.96)    |            |
| zWT(UK)                                  | 80.13            | 80.13            |            |
| (range)                                  | (60.82, 99.09)   | (60.34, 97.12)   |            |
| zHT(UK)                                  | -1.83            | -2.16            |            |
| (range)                                  | (-8.05, 4.27)    | (-8.57, 3.34)    |            |
| <b>Adult<sup>3</sup></b>                 |                  |                  |            |
| N                                        | 929              | 497              | 1426       |
| WT mean                                  | 54.65            | 59.68            |            |
| (range)                                  | (33.74, 100.02)  | (35.92, 115.42)  |            |
| HT mean                                  | -0.59            | -1.39            |            |
| (range)                                  | (-4.55, 3.28)    | (-6.09, 3.25)    |            |
| zWT(UK)                                  | 159.10           | 170.57           |            |
| (range)                                  | (137.40, 179.40) | (148.60, 197.10) |            |
| zHT(UK)                                  | -0.75            | -0.97            |            |
| (range)                                  | (-4.35, 2.61)    | (-4.12, 2.84)    |            |
| BMI mean                                 | 21.56            | 20.47            |            |
| (range)                                  | (12.64, 37.16)   | (11.67, 36.84)   |            |

BW, birthweight; LG, length; HT, height; zHT(UK), height-for-age z-score; WT, weight; zWT(UK), weight-for-age z-score. **A.** <sup>1</sup> Analyses other than those of adults involved at least two age points from each individual, age across the whole study population (N=2535) is thus not shown. Further details on numbers per age group are shown in Table 1. **B.** zHT(UK) and zWT(UK) refer to z-scores derived from UK standards for comparative purposes (Freeman JV *et al.* Cross sectional stature and weight reference curves for the UK, 1990. *Arch Dis Child* 1995;73:17– 24). <sup>2</sup> nearest observation to 2 years of age (>1.5 and <2.5 y); <sup>3</sup> first measurement at adult age (>20 y).

**Supplementary Table 2.** Details of polymorphisms genotyped in Gambian study population

| SNP ID     | Gene                 | Effect allele | Other allele | Homozygotes for effect allele [N] | Heterozygotes [N] | Homozygotes for other allele [N] | Imputed genotypes [N] |
|------------|----------------------|---------------|--------------|-----------------------------------|-------------------|----------------------------------|-----------------------|
| rs10146997 | <i>NRXN3</i>         | G             | A            | 610                               | 1302              | 640                              | 3                     |
| rs10838738 | <i>MTCH2</i>         | G             | A            | 2467                              | 86                | 2                                | 0                     |
| rs10913469 | <i>SEC16B</i>        | C             | T            | 1309                              | 1042              | 197                              | 7                     |
| rs11847697 | <i>PRKD1</i>         | T             | C            | 914                               | 1228              | 412                              | 1                     |
| rs12016871 | <i>MTIF3</i>         | T             | C            | 2373                              | 172               | 6                                | 4                     |
| rs12488483 | <i>CADM2</i>         | G             | A            | 200                               | 1071              | 1275                             | 9                     |
| rs1514175  | <i>TNNI3K</i>        | A             | G            | 169                               | 1005              | 1364                             | 17                    |
| rs1555543  | <i>PTBP2</i>         | C             | A            | 737                               | 1337              | 423                              | 58                    |
| rs17782313 | <i>MC4R</i>          | C             | T            | 1502                              | 815               | 204                              | 34                    |
| rs206936   | <i>NUDT3</i>         | G             | A            | 389                               | 1255              | 900                              | 11                    |
| rs2112347  | <i>FLJ35779</i>      | T             | G            | 587                               | 1251              | 688                              | 29                    |
| rs2241423  | <i>MAP2K5</i>        | G             | A            | 470                               | 1306              | 774                              | 5                     |
| rs2287019  | <i>QPCTL</i>         | C             | T            | 42                                | 493               | 1946                             | 74                    |
| rs2568958  | <i>NEGR1</i>         | A             | G            | 427                               | 1253              | 867                              | 8                     |
| rs2890652  | <i>LRP1B</i>         | C             | T            | 931                               | 1230              | 373                              | 21                    |
| rs3810291  | <i>TMEM160</i>       | A             | G            | 2237                              | 296               | 11                               | 11                    |
| rs4929949  | <i>RPL27A</i>        | C             | T            | 877                               | 1224              | 451                              | 3                     |
| rs6548238  | <i>TMEM18</i>        | C             | T            | 50                                | 532               | 1972                             | 1                     |
| rs713586   | <i>RBJ_POMC</i>      | C             | T            | 14                                | 328               | 2181                             | 32                    |
| rs7138803  | <i>BCDIN3D_FAIM2</i> | A             | G            | 1976                              | 524               | 52                               | 3                     |
| rs7640855  | <i>CADM2</i>         | A             | G            | 2441                              | 106               | 4                                | 4                     |
| rs7647305  | <i>TRA2B_ETV5</i>    | C             | T            | 459                               | 1250              | 835                              | 11                    |
| rs887912   | <i>FANCL</i>         | T             | C            | 2287                              | 257               | 9                                | 2                     |
| rs925946   | <i>BDNF</i>          | T             | G            | 1578                              | 835               | 140                              | 2                     |
| rs987237   | <i>TFAP2B</i>        | G             | A            | 2010                              | 509               | 29                               | 7                     |
| rs989139   | <i>GPRC5B</i>        | C             | T            | 503                               | 1213              | 832                              | 7                     |
| rs9941349  | <i>FTO</i>           | T             | C            | 1920                              | 578               | 52                               | 5                     |
| rs4836133  | <i>ZNF608</i>        | A             | C/G          | 31                                | 516               | 2007                             | 1                     |
| rs13107325 | <i>SLC39A8</i>       | T             | C            | 2494                              | 0                 | 0                                | NA                    |
| rs10938397 | <i>GNPDA2</i>        | G             | A            | 2538                              | 0                 | 0                                | NA                    |

SNPs associated with BMI by Speliotes and colleagues (2010) or surrogate markers to the original SNPs, locating within the same haplotype block in HapMap Yoruba and Caucasians ( $r^2 > 0.8$ ), were screened in our Gambian population (N=). Note: No suitable surrogate SNP was identified for KCTD15 rs11084753, LRRN6C rs2183825 and SH2B1 rs7498665.
